# Supplementary material for: Self-assembled long-chain organic ion grafted carbon dot ionic nanohybrids with liquid-like behavior and dual luminescence
Source: Royal Society of Chemistry journal article supplement (doi:10.1039/c3nj00715d), 2013-01-01
Supplement: c3nj00715d.pdf [file c3nj00715d.pdf]

Submitted to New Journal of Chemistry

Electronic Supplementary Material

For

**Self-assembled ionic nanohybrids of long-chain organic ion  
grafted carbon dots with liquid-like behavior and dual  
luminescence**

Denian Li<sup>a</sup>, Xuan Hu<sup>a</sup>, Qi Li<sup>a</sup>, Lijie Dong<sup>a</sup>, Jing Huang<sup>a</sup>, Hairong Li<sup>a</sup>, Haian Xie<sup>a</sup> and

Chuanxi Xiong<sup>\*a,b</sup>

<sup>a</sup>State Key Laboratory of Advanced Technology for Materials Synthesis and Processing, and School of Materials Science and Engineering, Wuhan University of Technology, Wuhan 430070, People's Republic of China.

<sup>b</sup>School of Materials Science and Engineering, Wuhan Textile University, Wuhan 430073, People's Republic of China.

E-mail: [cxx@live.whut.edu.cn](mailto:cxx@live.whut.edu.cn)

***Results & Discussions***



**Figure S1.** A contrast showing optical appearance of the mixture before and after extraction. The brown color indicates the location of CDs.



**Figure S2.** Size distribution of N-CDs obtained by measuring the diameters of 100 N-CDs in Fig. 2c.



**Figure S3.** Thermal gravimetric analysis of N-CDs.



**Figure S4.** Normalized fluorescence spectra of N-CDs in acetone and absence of any solvents (at 360 nm excitation).



**Figure S5.** Cartoon illustration of CDs, N-CDs in water and, N-CDs in organic solvents.



**Figure S6.** Fluorescence spectra of N-CDs dissolved in solution of mixed water and acetone with different volume proportions. Volume of water ( $V_w$ ) and acetone ( $V_a$ ).



**Figure S7.** UV-vis absorption spectra of CDs in water and N-CDs in ethanol. The 230 nm absorption peak in orange curve can be attributed to carbonyl groups in CDs. The emerging peaks at 225 nm and 270 nm are ascribed to absorptions by NPEQ.
